# Supplementary material
Source: PubMed Central journal article supplement (PMC2836069)
Supplement: supp_M109.068007_jbc.M109.068007-1.pdf [file supp_M109.068007_jbc.M109.068007-1.pdf]

# Suppl. 1

## A. aP2-p65 plasmid

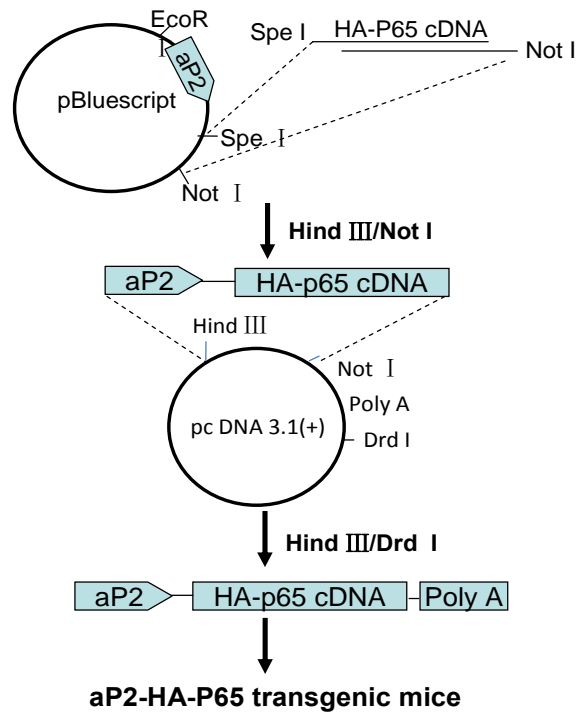

## B. Peritoneal macrophages

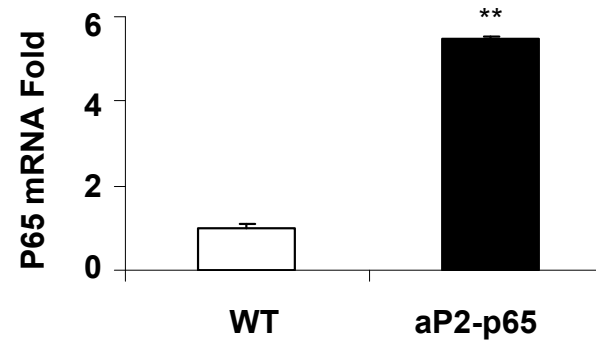

**Suppl. 1 p65 expression in aP2-p65 mice.** A. Diagram of construction of aP2-p65 vector. B. p65 mRNA level in peritoneal macrophages. In the bar figure, values are the mean  $\pm$  SEM (N=3). \*\* P<0.001 by Student's t test.

## Suppl. 2

### A. Energy expenditure

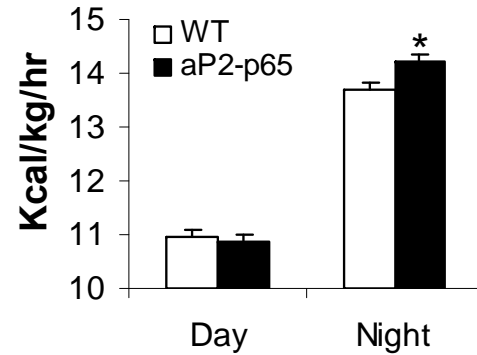

### B. RER

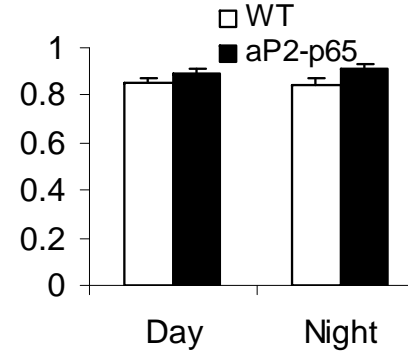

### C. Body weight

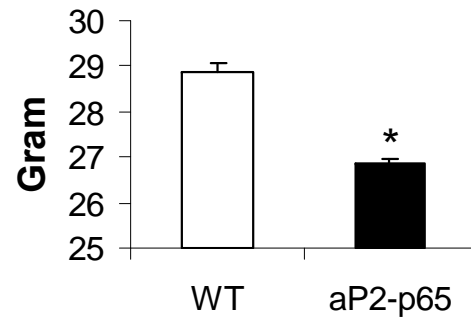

### D. P65 expression in WAT

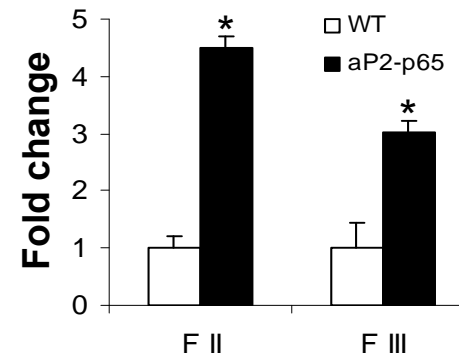

**Suppl. 2 Energy expenditure in founder 3 of aP2-p65 mice.** The tests were conducted in mice at 5 months of age. A. Energy expenditure. B. RER. C. Body weight. D. P65 mRNA expression in founder 2 (FII) and 3 (FIII). The data were presented as mean  $\pm$  SEM (n=4), \*p<0.05.

# Suppl. 3

## A. Nuclear extract in WB

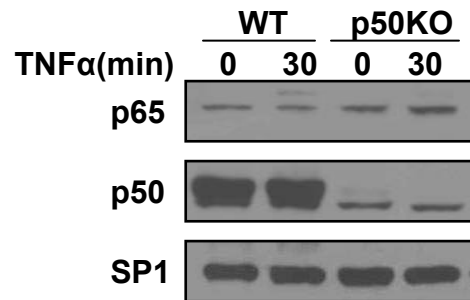

## B. EMSA

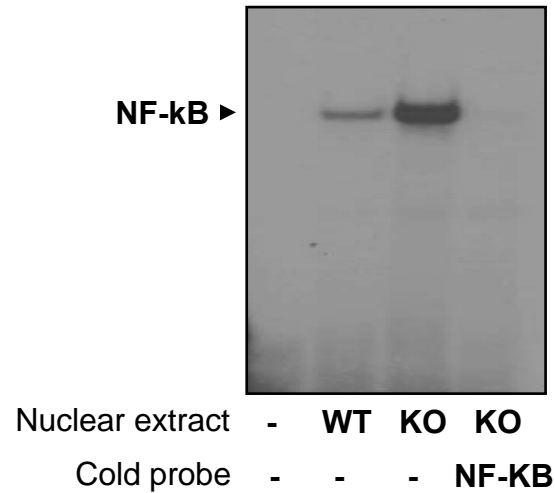

**Suppl. 3 NF-kB p65 activity in adipose tissue of p50-KO mice.** NF-kB p65 activity was examined by Western blot and EMSA assays using the nuclear extracts of epididymal fat pads of p50-KO mice. (A) P65 protein determined in a Western blot. (B) DNA-binding activity of NF-kB determined by the EMSA assay.

## Suppl. 4

### A. Fasting glucose

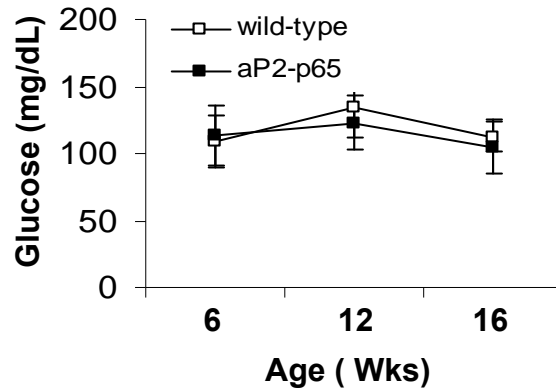

### B. Fasting insulin

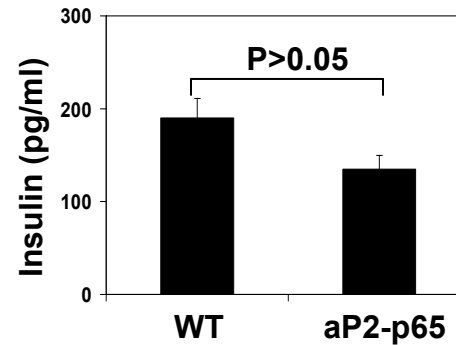

### C. ITT on chow diet

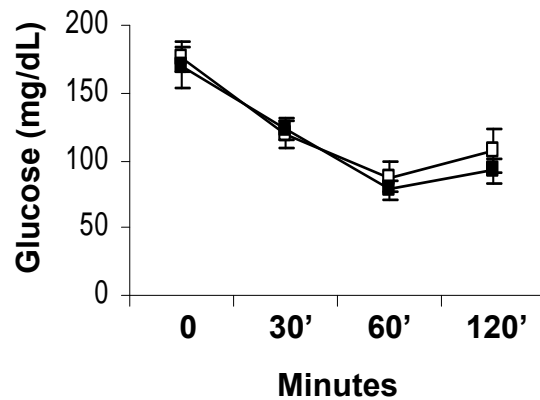

### D. GTT on chow diet

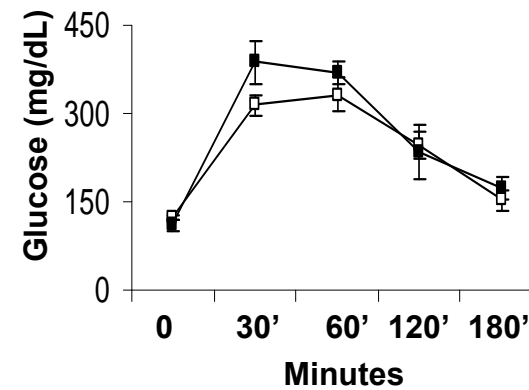

**Suppl. 4 Insulin sensitivity in aP2-p65 mice on Chow diet.** (A) Fasting glucose. Fasting glucose was determined in the tail vein blood after a 12 hr fast at the ages indicated. (B) Fasting insulin. The tests were done at 18 weeks of age. (C) ITT. ITT was done after a 4 hr fast at 14 weeks of age. (D) GTT. The test was done at 16 weeks of age. Values are the mean  $\pm$  SEM (n=10).
